# Supplementary material for: Microsecond Electrical Breakdown in Water: Advances Using Emission Analysis and Cavitation Bubble Theory
Source: MDPI journal article supplement (doi:10.3390/molecules27030662), 2022-01-20
Supplement: s1 [file s1]

# Supplementary Material

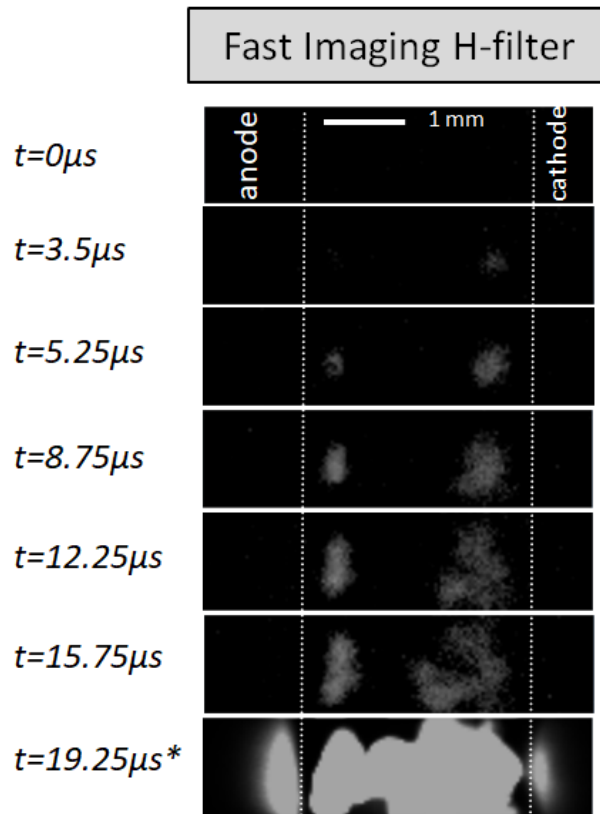

Figure S1. Fast imaging measurements representing the cathode regime of electrical breakdown in water using a  $656 \pm 10$  nm interference filter. ( $U = 12$  kV,  $\sigma = 100 \mu S/cm$ )—\* indicates that the contrast parameters of the image are different from other images.
